# Supplementary material
Source: PubMed Central journal article supplement (PMC2533216)
Supplement: 0803076105_0803076105SI.pdf [file 0803076105_0803076105SI.pdf]

# Supporting Information

Song *et al.* 10.1073/pnas.0803076105

## SI Methods

**Numt Amplification.** For both grasshoppers and crayfish, the genomic DNA was extracted by using Qiagen DNeasy extraction protocols for animal tissue. Two different approaches of numt generation were made between the two organisms. For grasshoppers, we performed PCR by using high fidelity Elongase polymerase (Invitrogen) and conserved primers on genomic DNA extract from single individuals of each species and cloned the PCR products by using the TOPO Cloning Kit (Invitrogen). A 488-bp fragment of COI was amplified by using a pair of insect conserved primers described in Simon *et al.* (1), C1-J-1751 (Ron) and C1-N-2191 (Nancy). This amplified region completely overlapped with the Folmer region (2) of COI. To test whether the same classes of numts were generated with both primer pairs, we also amplified a 709-bp fragment of COI gene from *S. americana* by using the Folmer primers, which yielded 19 paralogous haplotypes with in-frame stop codons, the mean sequence divergence from the mtDNA ortholog being 3.89%. For crayfish, we used the Folmer primers to generate 709 bp of the COI gene from genomic DNA extract. For 93 individuals, we were able to obtain clean COI sequences; however, 79 individuals from

southern populations of *O. australis* and *O. barri* yielded ambiguous sequences. We therefore cloned 15 individuals from those populations and also cloned eight individuals (including *O. incomptus* and *O. packardii*) that previously yielded clean unambiguous COI sequences to determine whether numts were present but not being detected without cloning. A total of 23 crayfish individuals from four species were cloned. PCR condition was as following: 10–12 min of hot start at 94–95°C, followed by 35–40 cycles of 94°C for 1 min, 40–45°C for 1 min, and 72°C for 1 min, and a 7-min final extension at 72°C. The resulting PCR products were cloned (125 clones for grasshoppers, 560 for crayfish), which were amplified by PCR and sequenced by using M13 primers (Table S3). Sequencing reactions were performed by using ABI BigDye terminator sequencing technology and raw sequence files were edited in Sequencher 4.6 (GeneCodes Corp.). Contigs of edited sequences and primer sequences were created to identify the haplotypes and both ends of the sequences matching the primer sequences were excised to remove artificial nucleotide similarity introduced by PCR amplification, resulting in the final lengths of 439 bp for grasshoppers and 658 bp for crayfish.

1. Simon C, *et al.* (1994) Evolution, weighting, and phylogenetic utility of mitochondrial gene sequences and a compilation of conserved polymerase chain reaction primers. *Ann Entomol Soc Am* 87:651–701.

2. Folmer O, Black M, Hoeh W, Lutz R, Vrijenhoek R (1994) DNA primers for amplification of mitochondrial cytochrome c oxidase subunit I from diverse metazoan invertebrates. *Mol Mar Biol Biotechnol* 3:294–299.

**Table S1. Summary of sequence characteristics of numt haplotypes generated in this study**

| Species                               | Unique haplotypes | mtDNA AT% | Numt haplotypes | % numt | Numt AT% | Length variation | Deletion | Insertion | Point mutation | Stop codon |
|---------------------------------------|-------------------|-----------|-----------------|--------|----------|------------------|----------|-----------|----------------|------------|
| <u>Grasshoppers</u>                   |                   |           |                 |        |          |                  |          |           |                |            |
| <i>Locusta migratoria</i> (n = 1)     | 14                | 65.83     | 3               | 20.00  | 65.74    | 379–437          | 1–7      | 0–2       | 31–76          | 0–2        |
| <i>Acrida willemsei</i> (n = 1)       | 13                | 65.15     | 6               | 46.15  | 65.44    | 356–440          | 0–3      | 0–1       | 6–61           | 0–17       |
| <i>Calliptamus italicus</i> (n = 1)   | 10                | 62.19     | 2               | 20.00  | 61.57    | 438–439          | 0–1      | 0         | 1–18           | 0–14       |
| <i>Schistocerca americana</i> (n = 1) | 25                | 61.73     | 11              | 44.00  | 60.88    | 438–449          | 0–4      | 0–1       | 28–115         | 0–11       |
| <u>Crayfish</u>                       |                   |           |                 |        |          |                  |          |           |                |            |
| <i>Orconectes australis</i> (n = 79)  | 122               | 63.12     | 60              | 49.18  | 63.40    | 654–659          | 0–4      | 0–10      | 11–81          | 0–24       |
| <i>Orconectes barri</i> (n = 16)      | 60                | 63.08     | 46              | 76.67  | 63.66    | 646–659          | 0–7      | 0–2       | 4–86           | 0–24       |
| <i>Orconectes incomptus</i> (n = 4)   | 4                 | 63.11     | 1               | 25.00  | 63.01    | 657              | 1        | 0         | 1              | 17         |
| <i>Orconectes packardi</i> (n = 20)   | 24                | 63.09     | 4               | 16.67  | 63.13    | 657              | 1        | 0         | 52–81          | 19–22      |

Unique haplotypes were determined by comparing each haplotype against each other and against orthologous mtDNA sequences. Numt haplotypes were identified by indels, in-frame stop codons, compositional bias, and phylogenetic analyses. % numt represents the proportion of numt haplotypes to unique haplotypes within a given species. The mean sequence divergence of haplotypes from the mtDNA orthologs was different for each species of grasshoppers (*C. italicus* [0.63%], *L. migratoria* [3.08%], *A. willemsei* [5.62%] and *S. americana* [7.89%]) and was generally high for crayfish from all 11 localities ranging from 9.32 to 12.15%.

**Table S2. Population-specific variation in the number of numt haplotypes in four crayfish species. AL: Alabama; TN: Tennessee; TNAL: Tennessee south of Grundy County to Alabama border; KY: Kentucky; KYTN: Kentucky-Tennessee border**

| Species             | State    | Population  | Unique haplotypes | Numt haplotypes    | Mean sequence divergence (%) from mtDNA ortholog (range) |
|---------------------|----------|-------------|-------------------|--------------------|----------------------------------------------------------|
| <i>O. australis</i> | AL       | LIMROCK     | 13                | 12                 | 10.05 (1.71–11.59)                                       |
|                     | AL       | DOUGGREEN   | 1                 | 0                  | N/A                                                      |
|                     | AL       | HERING      | 7                 | 7                  | 13.12 (12.88–13.46)                                      |
|                     | AL       | SCOTT       | 1                 | 1                  | 12.67                                                    |
|                     | AL       | SHELTA      | 22                | 20                 | 12.32 (7–14.02)                                          |
|                     | TN       | BAILEY      | 2                 | 0                  | N/A                                                      |
|                     | TN       | BLINDFISH   | 3                 | 0                  | N/A                                                      |
|                     | TN       | BLOWING     | 1                 | 0                  | N/A                                                      |
|                     | TN       | CAMPSGULF   | 1                 | 0                  | N/A                                                      |
|                     | TN       | CAPSHAW     | 4                 | 0                  | N/A                                                      |
|                     | TN       | CUMBER      | 3                 | 0                  | N/A                                                      |
|                     | TN       | FALLEN      | 1                 | 0                  | N/A                                                      |
|                     | TN       | GLENCORA    | 1                 | 0                  | N/A                                                      |
|                     | TN       | JACO        | 1                 | 0                  | N/A                                                      |
|                     | TN       | LAUREL      | 3                 | 0                  | N/A                                                      |
|                     | TN       | LOSTCOVE    | 1                 | 0                  | N/A                                                      |
|                     | TN       | LOSTCREEK   | 1                 | 0                  | N/A                                                      |
|                     | TN       | LOTTDEAN    | 2                 | 0                  | N/A                                                      |
|                     | TN       | MERRY       | 9                 | 0                  | N/A                                                      |
|                     | TN       | MILLHOLLOW  | 2                 | 0                  | N/A                                                      |
|                     | TN       | NORTON      | 1                 | 0                  | N/A                                                      |
|                     | TN       | ROCKY       | 6                 | 0                  | N/A                                                      |
|                     | TN       | RUMBLING    | 8                 | 7                  | 9.99 (6.26–12.1)                                         |
|                     | TN       | SKILLMAN    | 1                 | 0                  | N/A                                                      |
|                     | TN       | VIRGIN      | 1                 | 0                  | N/A                                                      |
|                     | TN       | WATERFALL   | 2                 | 0                  | N/A                                                      |
|                     | TN       | WINCHING    | 2                 | 0                  | N/A                                                      |
|                     | TNAL     | DRY         | 1                 | 0                  | N/A                                                      |
|                     | TNAL     | FLOORLESS   | 1                 | 0                  | N/A                                                      |
|                     | TNAL     | LUSK        | 3                 | 0                  | N/A                                                      |
|                     | TNAL     | PEARSON     | 11                | 10                 | 11.97 (11.38–12.31)                                      |
|                     | TNAL     | REDTRILLIUM | 3                 | 3                  | 11.92 (11.72–12.11)                                      |
| TNAL                | WITHER   | 2           | 0                 | N/A                |                                                          |
| TNAL                | WOODLEE  | 1           | 0                 | N/A                |                                                          |
| <i>O. barri</i>     | KYTN     | CLINTON     | 36                | 33                 | 10.73 (0.63–12.2)                                        |
|                     | KYTN     | CORNSTARCH  | 16                | 13                 | 10.15 (5.01–14.62)                                       |
|                     | KYTN     | GRAYSON     | 1                 | 0                  | N/A                                                      |
|                     | KYTN     | REDBUD      | 1                 | 0                  | N/A                                                      |
|                     | KYTN     | REDMOND     | 1                 | 0                  | N/A                                                      |
|                     | KYTN     | STREAM      | 2                 | 0                  | N/A                                                      |
| <i>O. incomptus</i> | KYTN     | TONAYS      | 3                 | 0                  | N/A                                                      |
|                     | TN       | CHERRY      | 1                 | 0                  | N/A                                                      |
| <i>O. packardii</i> | TN       | FLYNN       | 1                 | 0                  | N/A                                                      |
|                     | TN       | NORTHFORK   | 2                 | 1                  | 0.16                                                     |
|                     | KY       | BIGSINK     | 1                 | 0                  | N/A                                                      |
|                     | KY       | CEDARCREEK  | 1                 | 0                  | N/A                                                      |
|                     | KY       | CORAL       | 1                 | 0                  | N/A                                                      |
|                     | KY       | DAVES       | 1                 | 0                  | N/A                                                      |
|                     | KY       | DUVALTS     | 1                 | 0                  | N/A                                                      |
|                     | KY       | DYKES       | 1                 | 0                  | N/A                                                      |
|                     | KY       | FLETCHER    | 1                 | 0                  | N/A                                                      |
|                     | KY       | HAIL        | 2                 | 0                  | N/A                                                      |
|                     | KY       | JUGORNOT    | 6                 | 0                  | N/A                                                      |
| KY                  | PINEHILL | 1           | 0                 | N/A                |                                                          |
| KY                  | SLOANS   | 2           | 0                 | N/A                |                                                          |
| KY                  | TEAMERS  | 6           | 4                 | 11.23 (8.48–13.76) |                                                          |

**Table S3. Number of individuals used to generate numt haplotypes via cloning**

| Species             | Cave locality      | Number of Individuals* | Number of clones | Number of numt seqs <sup>†</sup> | Number of COI seqs <sup>†</sup> |
|---------------------|--------------------|------------------------|------------------|----------------------------------|---------------------------------|
| <i>O. australis</i> | Limrock Blowing    | 3                      | 77               | 42                               | 3                               |
|                     | Larkin             | 1                      | 8                | 4                                | 1                               |
|                     | Red Trillium       | 1                      | 3                | 1                                | 0                               |
|                     | Hering             | 1                      | 22               | 9                                | 0                               |
|                     | Doug Green         | 1                      | 24               | 11                               | 0                               |
|                     | Pearson            | 1                      | 26               | 9                                | 13                              |
|                     | Shelta             | 2                      | 53               | 39                               | 6                               |
|                     | Rumbling Falls     | 1                      | 39               | 8                                | 23                              |
|                     | Subtotal           | 11                     | 252              | 123                              | 46                              |
|                     | <i>O. packardi</i> | Teamers                | 1                | 31                               | 7                               |
| Jugornot            |                    | 1                      | 14               | 0                                | 8                               |
| Hail                |                    | 2                      | 35               | 0                                | 23                              |
| Subtotal            |                    | 4                      | 80               | 7                                | 51                              |
| <i>O. incomptus</i> | North Fork         | 2                      | 39               | 3                                | 29                              |
|                     | Cherry             | 2                      | 43               | 0                                | 26                              |
|                     | Subtotal           | 4                      | 82               | 3                                | 55                              |
| <i>O. barri</i>     | Clinton            | 3                      | 112              | 71                               | 9                               |
|                     | Cornstarch         | 1                      | 34               | 21                               | 5                               |
|                     | Subtotal           | 4                      | 146              | 92                               | 14                              |
| TOTAL               | 23                 | 560                    | 225              | 166                              |                                 |

\*Total number of individuals does not include the 18 individuals for which numts were sequenced cleanly without cloning.

<sup>†</sup>Includes repeat numt and COI haplotypes.
